# Supplementary material for: Hand Laser Perfusion Imaging to Assess Radial Artery Patency: A Pilot Study
Source: MDPI journal article supplement (doi:10.3390/jcm7100319), 2018-10-02
Supplement: s1 [file s1]

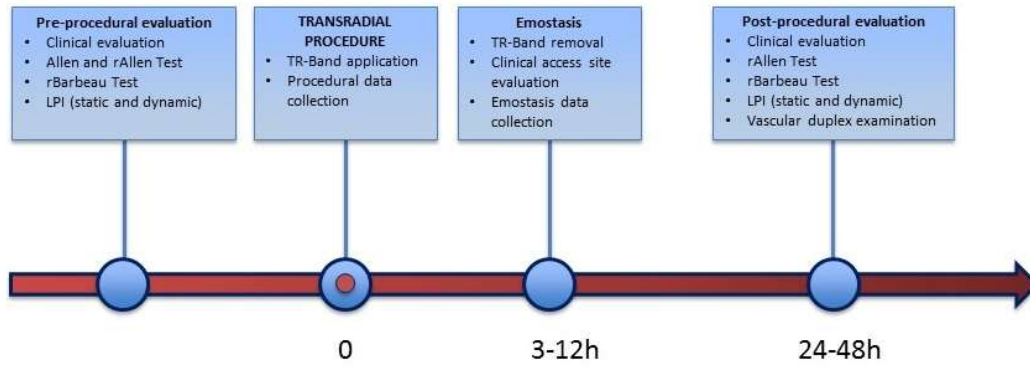

**Figure S1.** Study procedure timeline. The flowchart illustrates study procedures in a timeline.
